# Supplementary material for: Direct growth of cobalt-rich cobalt phosphide catalysts on cobalt foil: an efficient and self-supported bifunctional electrode for overall water splitting in alkaline media
Source: Royal Society of Chemistry journal article supplement (doi:10.1039/c7ta01776f), 2017-01-01
Supplement: c7ta01776f1.pdf [file c7ta01776f1.pdf]

## **Electronic Supplementary Information**

### **Direct growth of cobalt-rich cobalt phosphide catalyst on cobalt foil: an efficient and self-supported bifunctional electrode for overall water splitting in alkaline media**

Cheng-Zong Yuan<sup>a</sup>, Sheng-Liang Zhong<sup>b</sup>, Yi-Fan Jiang<sup>a</sup>, Zheng Kun Yang<sup>a</sup>,  
Zhi-Wei Zhao<sup>a</sup>, Sheng-Jie Zhao<sup>a</sup>, Nan Jiang<sup>a</sup> and An-Wu Xu<sup>a\*</sup>

<sup>a</sup> Division of Nanomaterials and Chemistry, Hefei National Laboratory for Physical Sciences at Microscale, University of Science and Technology of China, Hefei 230026, China.

<sup>b</sup> College of Chemistry and Chemical Engineering, Jiangxi Normal University, Nanchang 330022, P. R. China

\*To whom correspondence should be addressed.

Email: [anwuxu@ustc.edu.cn](mailto:anwuxu@ustc.edu.cn).

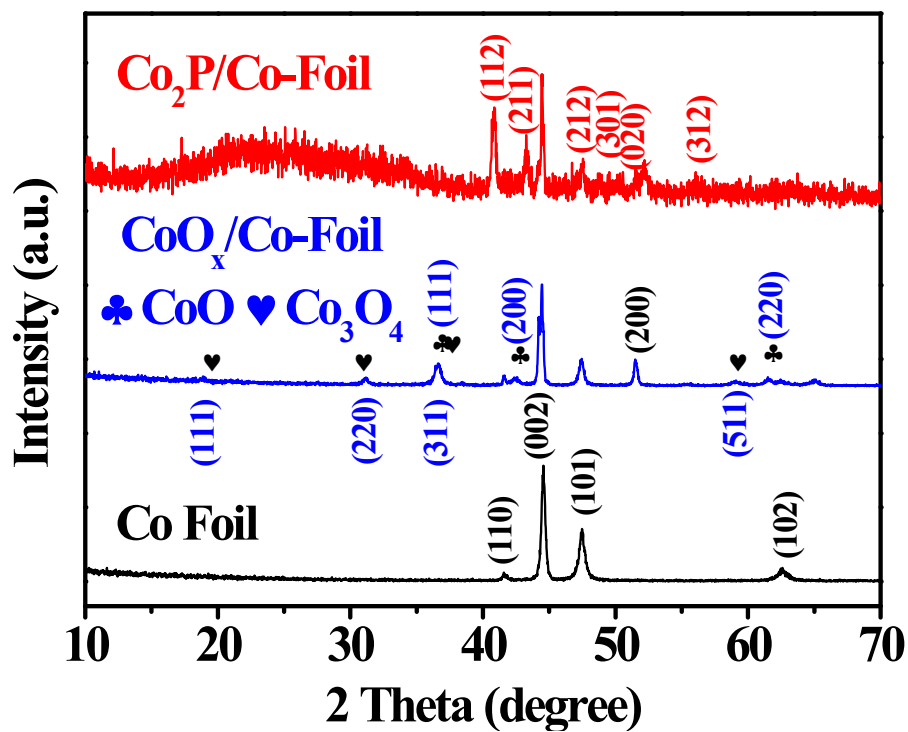

**Fig. S1** Powder XRD patterns of Co foil,  $\text{CoO}_x/\text{Co-Foil}$  and  $\text{Co}_2\text{P}/\text{Co-Foil}$  electrodes.

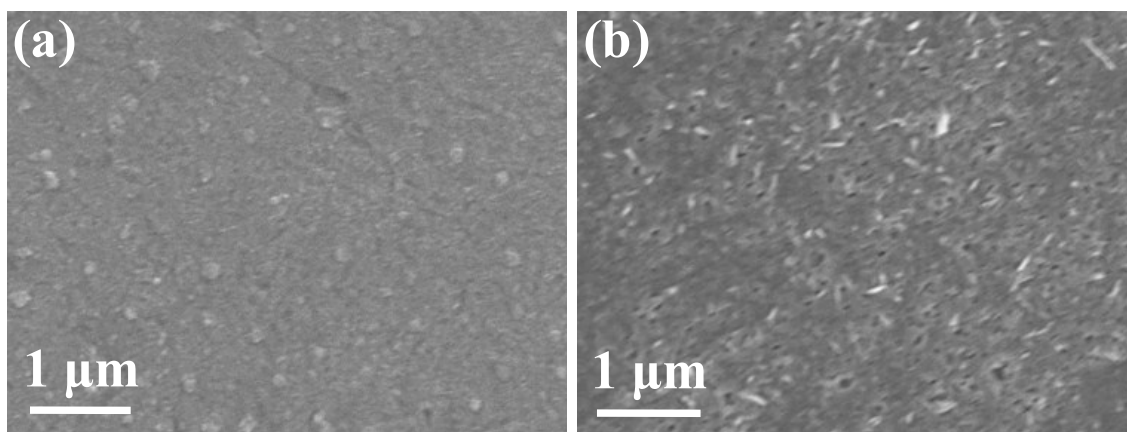

**Fig. S2** Scanning electron microscope (SEM) images of (a) Co foil, (b)  $\text{CoO}_x/\text{Co-Foil}$  electrode.

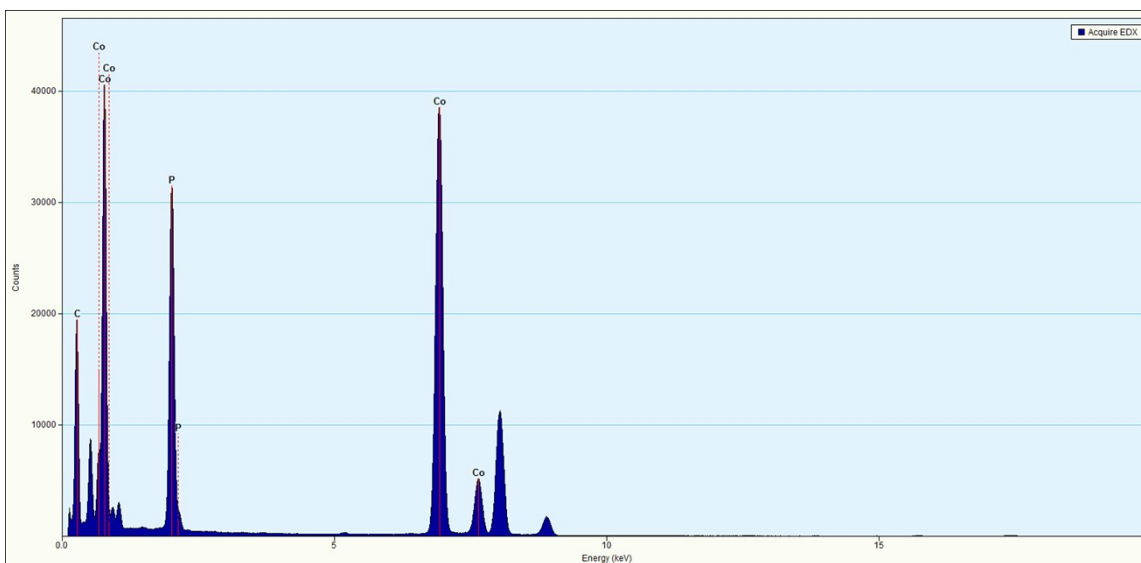

**Fig. S3** EDS spectrum of the as-made Co<sub>2</sub>P particles peeled off from Co<sub>2</sub>P/Co-Foil surface.

**Table S1** Ratios of P and Co elements in the obtained Co<sub>2</sub>P particles estimated from EDS analysis.

| Element | Atomic % | Weight % | Uncert. % |
|---------|----------|----------|-----------|
| P       | 31.12    | 20.03    | 0.04      |
| Co      | 64.36    | 78.83    | 0.10      |

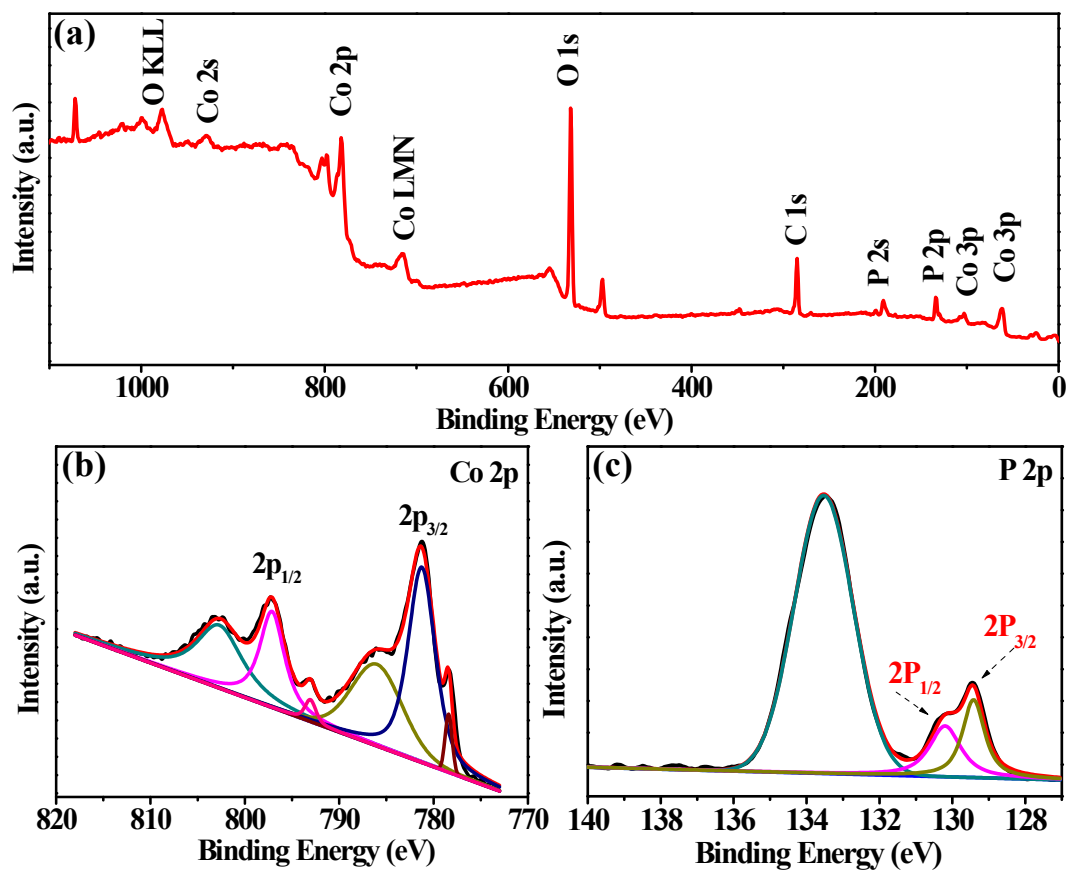

**Fig. S4** (a) XPS survey spectra of Co<sub>2</sub>P particles peeled off from the surface of Co<sub>2</sub>P/Co-Foil. (b) Co 2p and (c) P 2p narrow scans.

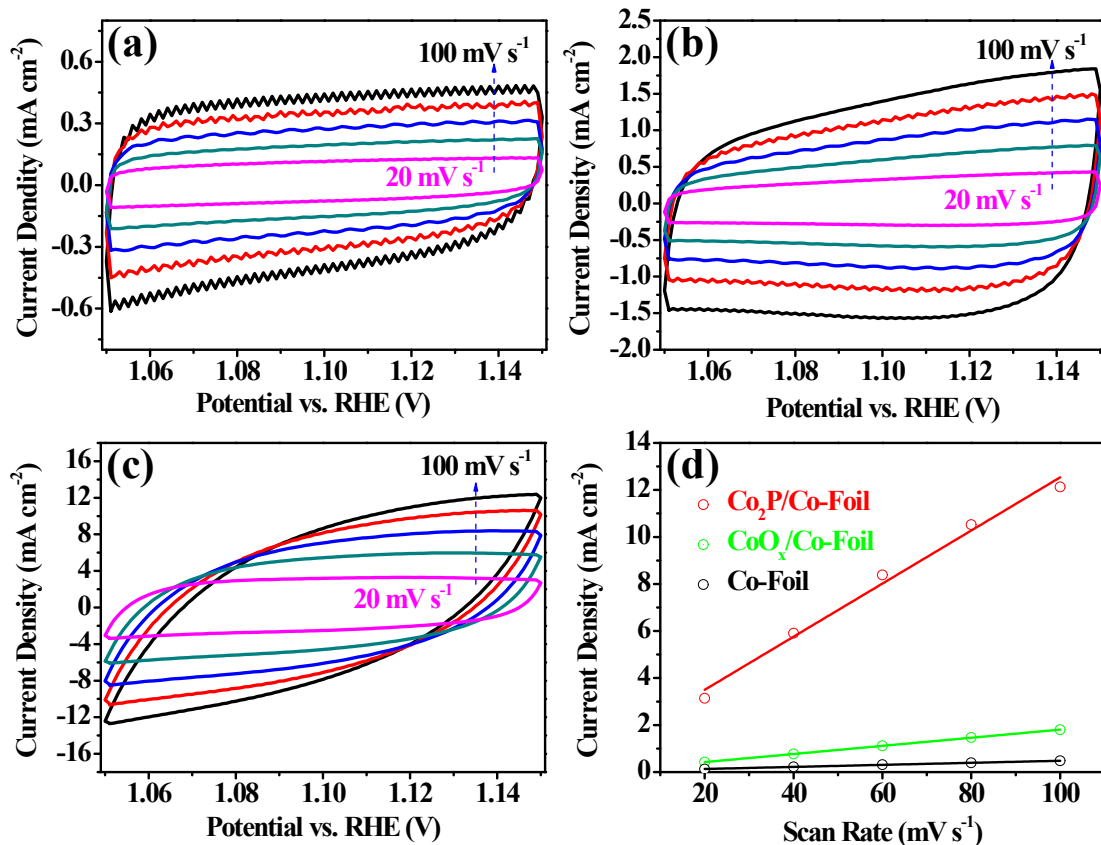

**Fig. S5** (a), (b) and (c) Cyclic voltammograms (CVs) of Co foil, CoO<sub>x</sub>/Co-Foil and Co<sub>2</sub>P/Co-Foil electrodes measured at different scan rates from 20 to 100 mV s<sup>-1</sup>. (d) Plots of the current density at 1.14 V vs. the scan rate, where the C<sub>dl</sub> values of Co-Foil, CoO<sub>x</sub>/Co-Foil and Co<sub>2</sub>P/Co-Foil are 4, 17.3 and 113 mF/cm<sup>2</sup>, respectively.

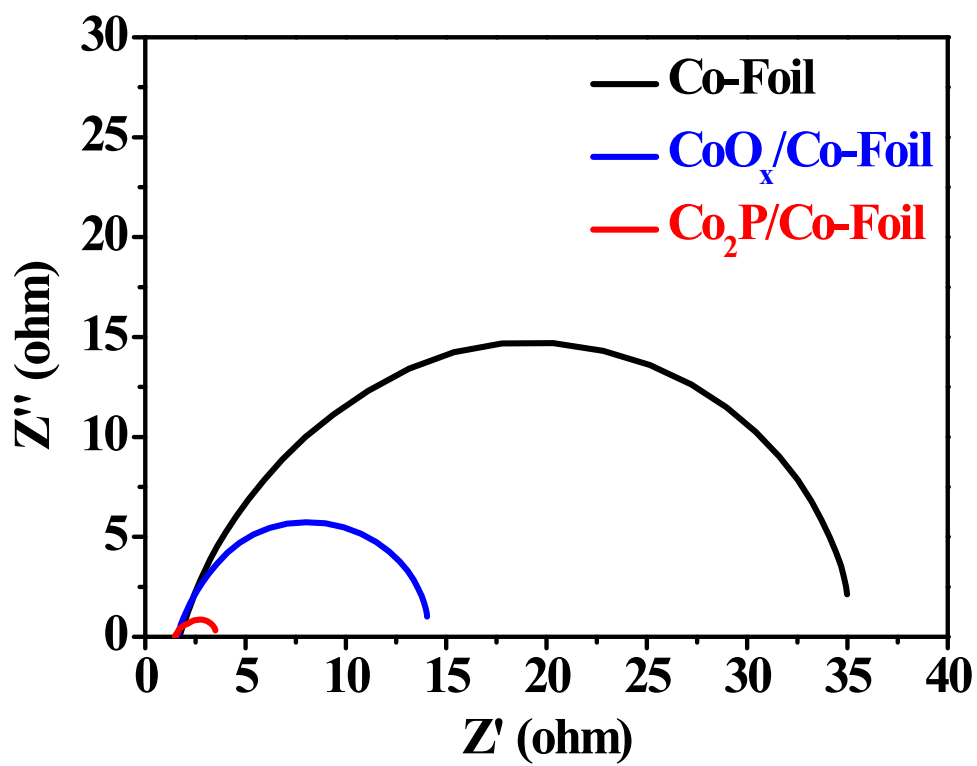

**Fig. S6** Electrochemical impedance spectra (EIS) for OER of Co-Foil, CoO<sub>x</sub>/Co-Foil and Co<sub>2</sub>P/Co-Foil electrodes recorded at 1.56 V vs. RHE.

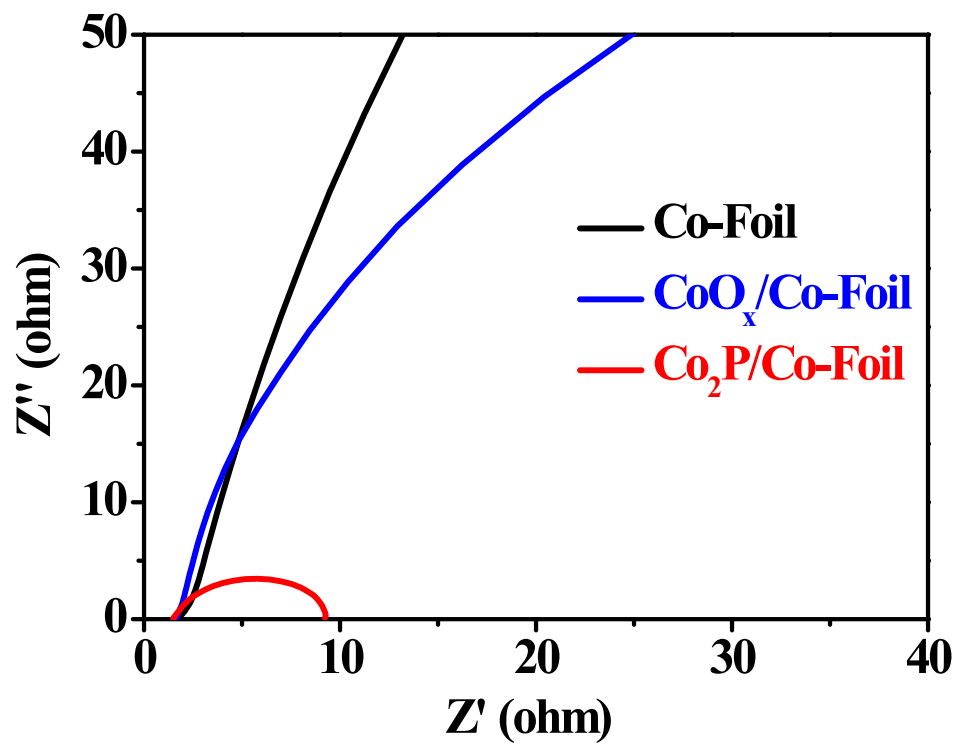

**Fig. S7** Electrochemical impedance spectra (EIS) for HER of Co-Foil, CoO<sub>x</sub>/Co-Foil and Co<sub>2</sub>P/Co-Foil electrodes recorded at -0.16 V vs. RHE.

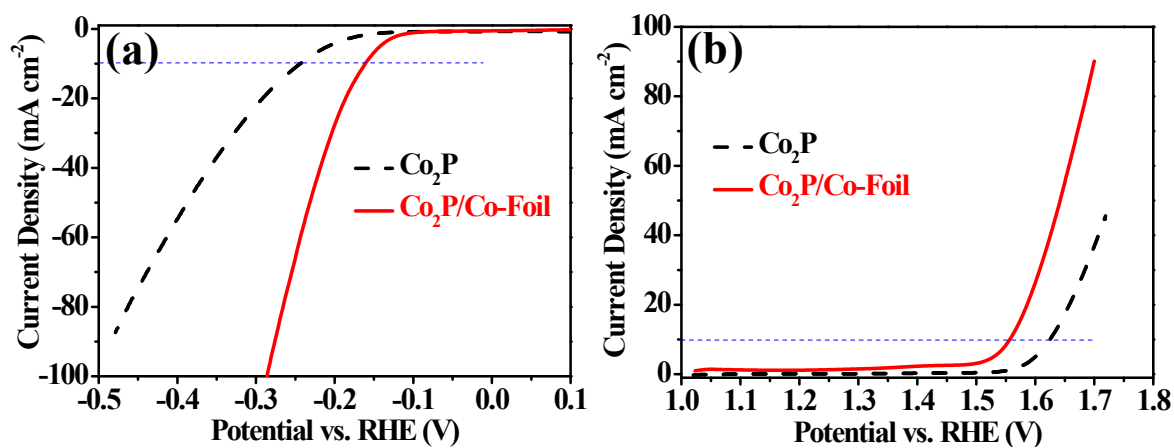

**Fig. S8** (a) HER polarization curves and (b) OER polarization curves of Co<sub>2</sub>P particles samples peeled off from Co<sub>2</sub>P/Co-Foil and the integrated Co<sub>2</sub>P/Co-Foil electrode.



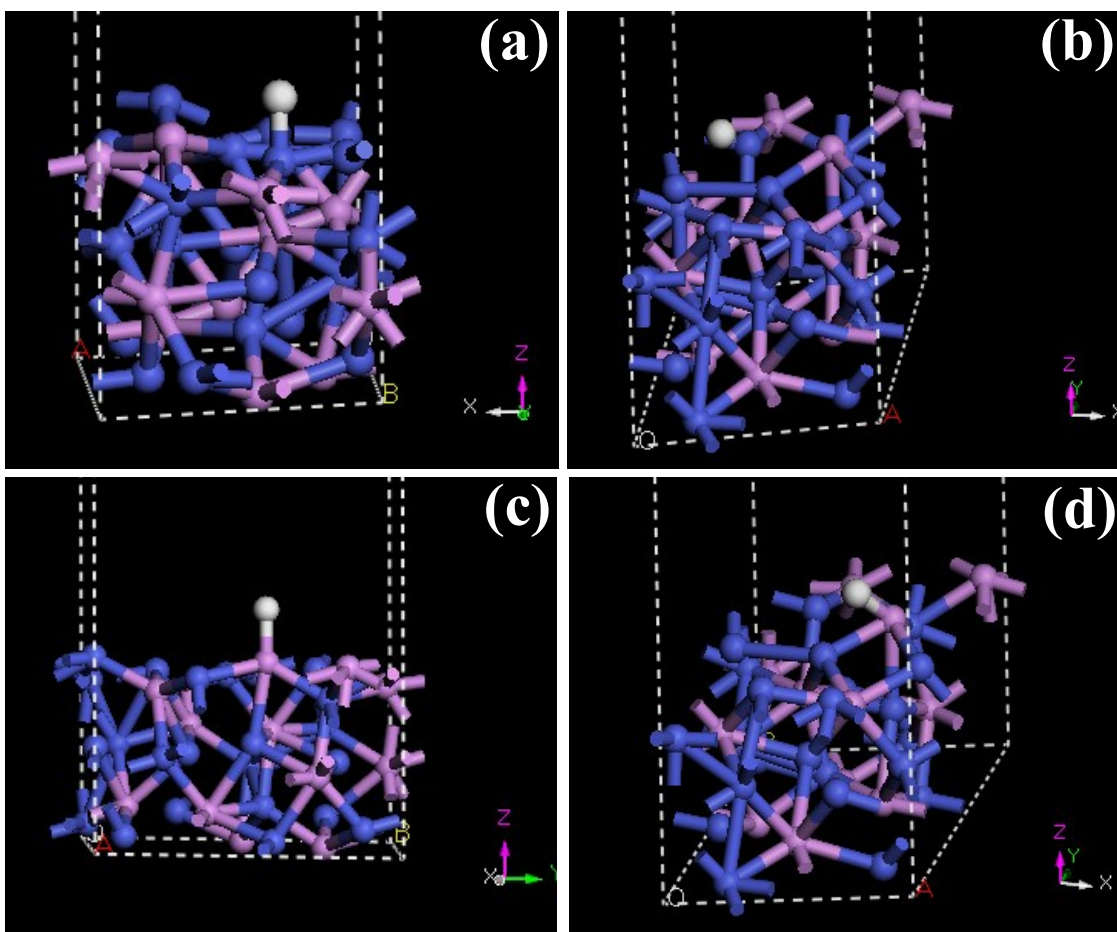

**Fig. S9** The corresponding side view of configuration of (a) hydrogen absorbed at the sites on the top of the Co atoms on (112) surface of Co<sub>2</sub>P, (b) the bridge sites of Co-Co, (c) the sites on the top of the P atoms, (d) the bridge sites of P-Co.

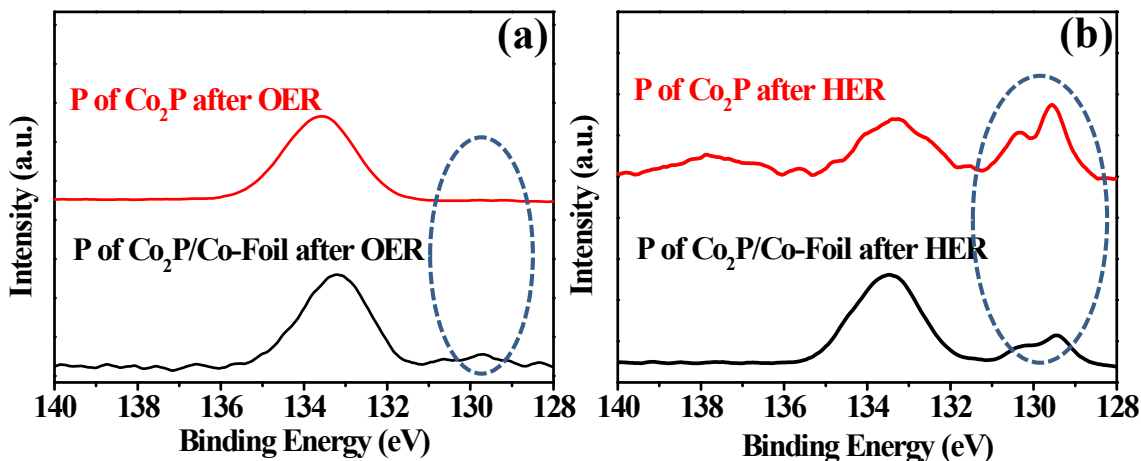

**Fig. S10** The XPS P 2p spectra of Co<sub>2</sub>P nanoparticles peeled off from the Co<sub>2</sub>P/Co-Foil and Co<sub>2</sub>P/Co-Foil electrode after OER and HER test.

To further verify the synergistic effect between Co<sub>2</sub>P and Co-Foil, XPS spectra of Co<sub>2</sub>P nanoparticles peeled off from Co<sub>2</sub>P/Co-Foil electrode and Co<sub>2</sub>P/Co-Foil after HER and OER were performed and shown in Fig. S10. According to the P 2p spectra of Co<sub>2</sub>P and Co<sub>2</sub>P/Co-Foil after HER and OER, it is clear that the peak intensity at 130 eV (belongs to phosphate) of Co<sub>2</sub>P increased higher than that of Co<sub>2</sub>P/Co-Foil and the peaks at 129.3 eV (P 2p<sub>3/2</sub>) and 130.1 eV (P 2p<sub>1/2</sub>) (belong to phosphide) reduced more than that of Co<sub>2</sub>P/Co-Foil after OER. Moreover, after HER the peaks of Co<sub>2</sub>P at 129.3 eV (P 2p<sub>3/2</sub>) and 130.1 eV (P 2p<sub>1/2</sub>) increased higher than that of Co<sub>2</sub>P/Co-Foil. These results suggest that during the HER and OER process, there are much electron transfer between Co<sub>2</sub>P and Co-Foil, confirming the synergistic effect between Co<sub>2</sub>P and Co-Foil, which is in line with the observed activity.

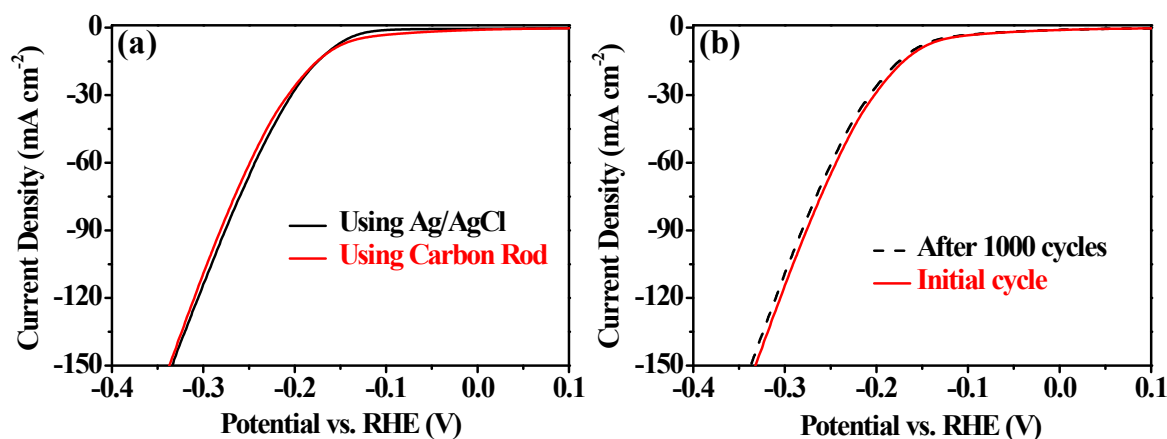

**Fig. S11** Electrochemical HER activities of the sample in 1 M KOH solution. (a) Polarization curves tested using the Ag/AgCl electrode and carbon rod as the counter electrode, respectively. (b) The stability of the obtained Co<sub>2</sub>P/Co-Foil electrode tested using the carbon rod as the counter electrode.

Recently, Johnny C. Ho et al. (DOI 10.1039/c5ta02551f) verified that the dissolution of Pt was observed when Pt is utilized as the counter electrode. It is more likely that the high activity observed is just Pt contamination on the electrode surface, especially in the stability testing process. Therefore, to eliminate the influence of Pt, we conducted the experiments (activity and stability) using the carbon rod as the counter electrode and the results were shown in Fig S11, which confirm that Pt has little influence on the activity of our Co<sub>2</sub>P/Co-Foil electrode.

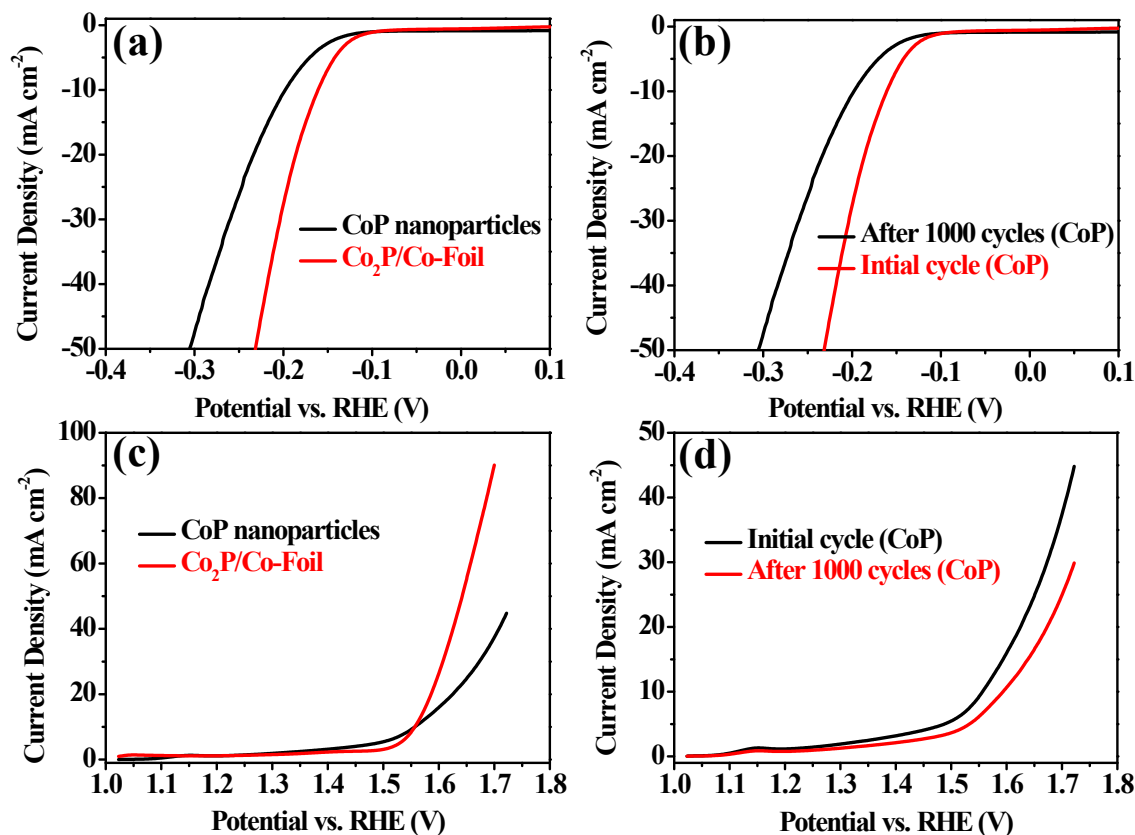

**Fig. S12** (a) Electrochemical HER activities polarization curves of CoP nanoparticles and the Co<sub>2</sub>P/Co-Foil electrode in 1M KOH. (b) Linear sweep voltammograms towards HER of the CoP nanoparticles obtained before and after 1000 potential cycles with the scan rate of 5 mV s<sup>-1</sup>. (c) OER polarization curves of CoP nanoparticles and the Co<sub>2</sub>P/Co-Foil electrode. (d) Linear sweep voltammograms towards OER of the CoP nanoparticles obtained before and after 1000 potential cycles.

To reveal the Co role in this system, CoP nanoparticles were prepared using the reported method<sup>1</sup> and corresponding performances were tested and shown in Fig. S12. These results reveal that the rich Co in this catalyst not only improves catalytic activities, but also makes the catalyst more stable during

the OER and HER process. The reasonable explanation is that cobalt-rich cobalt phosphides are nonstoichiometric, leading to more and significant metal-metal bonding in this catalyst, which can effectively enhance the electrical conductivity and make the catalyst more durable.

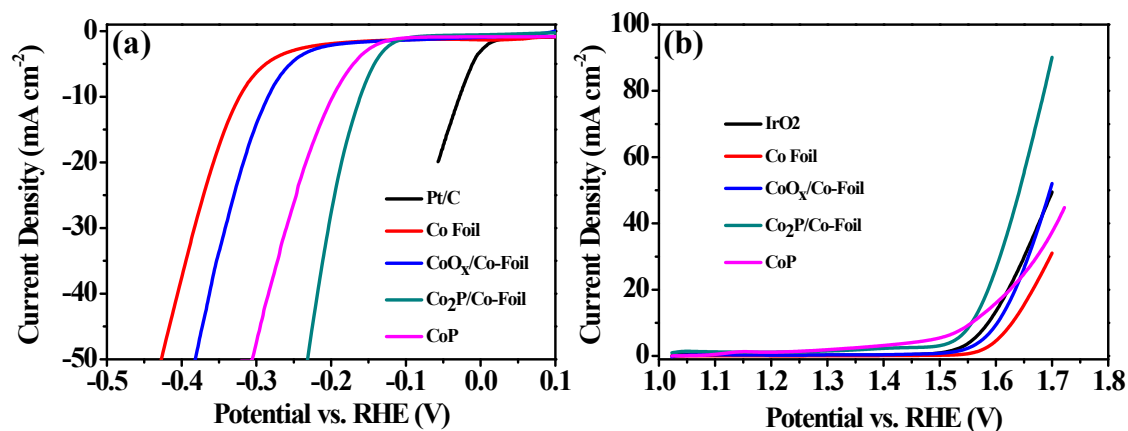

**Fig. S13** Electrochemical HER (a) and OER (b) activities polarization curves of the Co<sub>2</sub>P/Co-Foil electrode, CoO<sub>x</sub>/Co-Foil electrode, Co-Foil electrode, CoP nanoparticles and IrO<sub>2</sub> in 1M KOH. with the scan rate of 5 mV s<sup>-1</sup>.

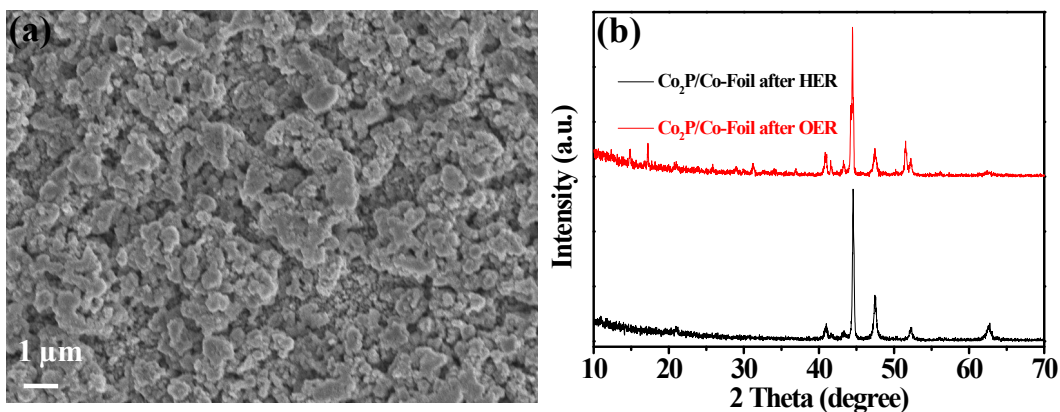

**Fig. S14** (a) Scanning electron microscope (SEM) image and (b) XRD pattern of Co<sub>2</sub>P/Co-Foil electrode after water splitting test.

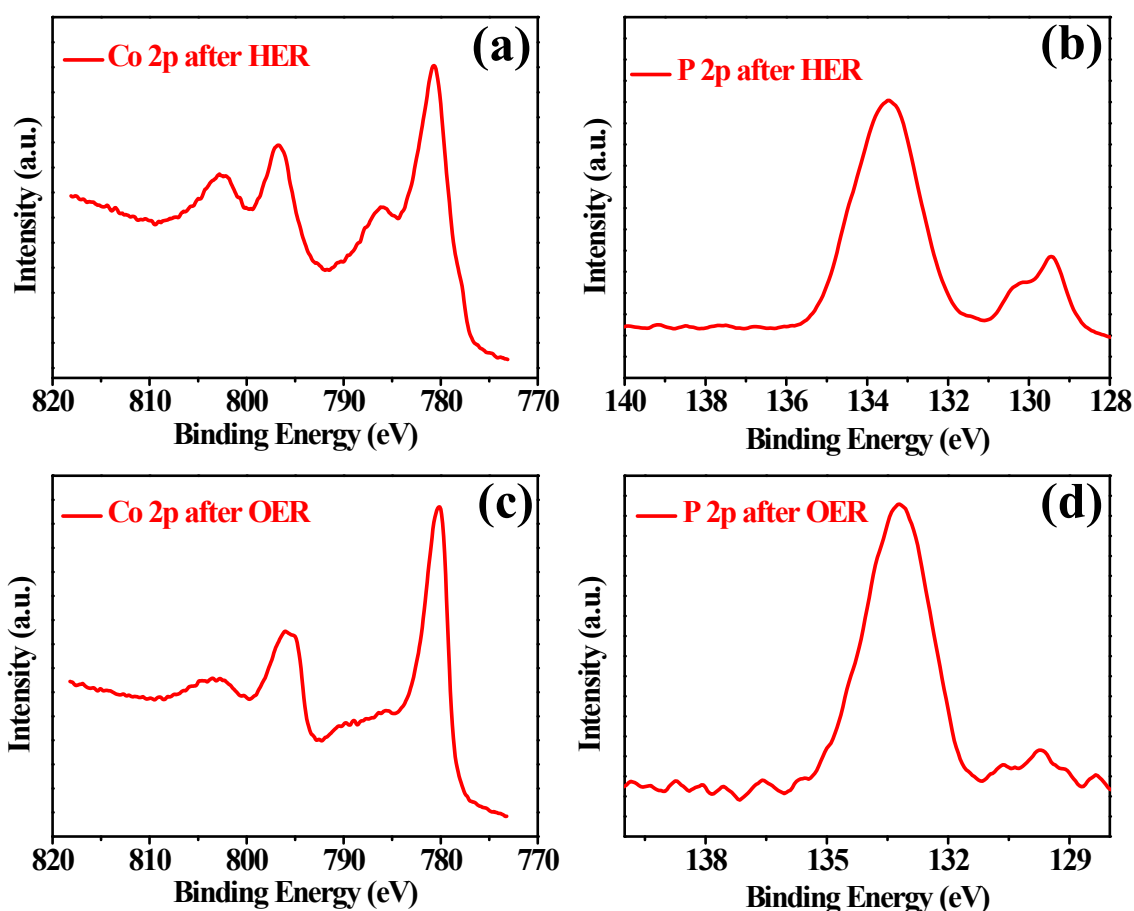

**Fig. S15** The XPS spectra of Co<sub>2</sub>P/Co-Foil electrode after HER or OER test.

**Table S2** The absorption energy of H at the different sites on the (112) surface of Co<sub>2</sub>P.

| Sites | Energy (eV) |
|-------|-------------|
| Co    | 0.480167    |
| Co-Co | -0.481073   |
| P     | 0.29206     |
| P-Co  | -0.486703   |

**Table S3** Comparison of OER performance in alkaline media of some transition metal-based electrocatalysts.

| Catalyst                                | Tafel Slope (mV/dec) | $\eta$ (@10 mA/cm <sup>2</sup> ) | Electrolyte | Stable time (h) | Ref.                                                             |
|-----------------------------------------|----------------------|----------------------------------|-------------|-----------------|------------------------------------------------------------------|
| Co <sub>2</sub> P/Co-Foil               | 79                   | 319                              | 1 M KOH     | 12              | This work.                                                       |
| a-CoSe/Ti                               | 69                   | 292                              | 1 M KOH     | 25              | <i>Chem. Commun.</i> , 2015, <b>51</b> , 16683. <sup>2</sup>     |
| Mn <sub>3</sub> O <sub>4</sub> /Ni foam | 86                   | 287                              | 1 M KOH     | 1000 cycles     | <i>J. Mater. Chem. A</i> , 2015, <b>3</b> , 14101. <sup>3</sup>  |
| Ni-P/Ni foam                            | 179.9                | /                                | 1 M KOH     | 50              | <i>J. Mater. Chem. A</i> , 2016, <b>4</b> , 5639. <sup>4</sup>   |
| Ni <sub>2</sub> P/Ni foam               | 112                  | 295                              | 1 M KOH     | 12              | <i>ACS Catal.</i> , 2017, <b>7</b> , 103. <sup>5</sup>           |
| Ni42-300/Ni42 steel                     | 71.6                 | 320                              | 0.1 M KOH   | 5.6             | <i>Adv. Funct. Mater.</i> , 2016, <b>26</b> , 6402. <sup>6</sup> |



**Table S4** Comparison of HER performance in alkaline media of some transition metal-based electrocatalysts.

| Catalyst                                  | Tafel Slope (mV/dec) | $\eta$ (@10 mA/cm <sup>2</sup> ) | Electrolyte | Stable time (h) | Ref.                                                                   |
|-------------------------------------------|----------------------|----------------------------------|-------------|-----------------|------------------------------------------------------------------------|
| Co <sub>2</sub> P/Co-Foil                 | 59                   | 154                              | 1 M KOH     | 12              | This work.                                                             |
| CoP/CC                                    | 129                  | 209                              | 1 M KOH     | 22              | <i>J. Am. Chem. Soc.</i> , 2014, <b>136</b> , 7587. <sup>7</sup>       |
| FeP NAs/CC                                | 146                  | 218                              | 1 M KOH     | 5000 cycles     | <i>ACS Catal.</i> , 2014, <b>4</b> , 4065. <sup>8</sup>                |
| CuCuO-NWs/Ni foam                         | 132                  | 140                              | 1 M KOH     | 50              | <i>Adv. Funct. Mater.</i> , 2016, <b>26</b> , 8555. <sup>9</sup>       |
| NiCo <sub>2</sub> S <sub>4</sub> /Ni foam | 58.9                 | 210                              | 1 M KOH     | 50              | <i>Adv. Funct. Mater.</i> , 2016, <b>26</b> , 4661. <sup>10</sup>      |
| Ni <sub>3</sub> S <sub>2</sub> /Ni foam   | 118                  | 123                              | 1 M KOH     | 10              | <i>Int. J. Hydrogen Energy</i> , 2015, <b>40</b> , 4727. <sup>11</sup> |
| Ni <sub>2</sub> P/NF                      | 60                   | 93                               | 1 M KOH     | 24              | <i>Nano Lett.</i> , 2016, <b>16</b> , 7718. <sup>12</sup>              |

## References

1. C. Zhang, Y. Huang, Y. F. Yu, J. F. Zhang, S. F. Zhuo and B. Zhang, *Chem. Sci.*, 2017, **8**, 2769–2775.
2. T. T. Liu, Q. Liu, A. M. Asiri, Y. L. Luo and X. P. Sun, *Chem. Commun.*, 2015, **51**, 16683–16686.
3. M. Q. Yu, Y. H. Li, S. Yang, P. F. Liu, L. F. Pan, L. Zhang and H. G. Yang, *J. Mater. Chem. A*, 2015, **3**, 14101–14104.
4. X. G. Wang, W. Li, D. H. Xiong and L. F. Liu, *J. Mater. Chem. A*, 2016, **4**, 5639–5646.
5. P. W. Menezes, A. Indra, C. Das, C. Walter, C. Göbel, V. Gutkin, D. Schmeißer and M. Driess, *ACS Catal.*, 2017, **7**, 103–109.
6. H. Schäfer, D. M. Chevrier, P. Zhang, J. Stangl, K. Müller-Buschbaum, J. D. Hardege, K. Kuepper, J. Wollschläger, U. Krupp, S. Dühnen, M. Steinhart, L. Walder, S. Sadaf and M. Schmidt, *Adv. Funct. Mater.*, 2016, **26**, 6402–6417.
7. J. Q. Tian, Q. Liu, A. M. Asiri and X. P. Sun, *J. Am. Chem. Soc.*, 2014, **136**, 7587–7590.
8. Y. H. Liang, Q. Liu, A. M. Asiri, X. P. Sun and Y. L. Luo, *ACS Catal.*, 2014, **4**, 4065–4069.
9. M. Kuang, P. Han, Q. H. Wang, J. Li and G. F. Zheng, *Adv. Funct. Mater.*, 2016, **26**, 8555–8561.
10. A. Sivanantham, P. Ganesan and S. Shanmugam, *Adv. Funct. Mater.*, 2016, **26**, 4661–4672.

11. C. Tang, Z. H. Pu, Q. Liu, A. M. Asiri, Y. L. Luo, X. P. Sun, *Int. J. Hydrogen Energy*, 2015, **40**, 4727–4732.
12. H. F. Liang, A. N. Gandi, D. H. Anjum, X. B. Wang, U. Schwingenschlögl and H. N. Alshareef, *Nano Lett.*, 2016, **16**, 7718–7725.
